# Supplementary material for: Design and preparation of three-dimensional hetero-electrocatalysts of NiCo-layered double hydroxide nanosheets incorporated with silver nanoclusters for enhanced oxygen evolution reactions
Source: Royal Society of Chemistry journal article supplement (doi:10.1039/d1nr01147b), 2021-01-01
Supplement: d1nr01147b1.pdf [file d1nr01147b1.pdf]

**Supporting Information (SI) for:**

**Design and Preparation of Three-Dimensional Hetero-  
electrocatalysts of NiCo -Layered Double Hydroxide Nanosheets  
Incorporated with Silver Nanoclusters for Enhanced Oxygen  
Evolution Reactions**

*Bingxian Chu <sup>#a</sup>, Qiuxia Ma <sup>#a</sup>, Zesheng Li<sup>c\*</sup>, Bolin Li <sup>#a</sup>, Furong Huang<sup>a</sup>, Qi Pang<sup>a\*</sup>, Yibo*

*Chen<sup>b\*</sup>, Bin Li<sup>a</sup>, Jin Zhong Zhang<sup>d</sup>*

*<sup>a</sup> School of Chemistry and Chemical Engineering Guangxi University / Guangxi Key Laboratory  
of Electrochemical Energy Materials, 100 University Road, Nanning 530004, China*

*<sup>b</sup> School of Chemistry and Chemical Engineering/Guangzhou Key Laboratory for Clean Energy  
and Materials, Guangzhou University, Guangzhou 510006, P. R. China*

*<sup>c</sup> College of Chemistry, Guangdong University of Petrochemical Technology, Maoming,  
Guangdong 525000, China.*

*<sup>d</sup> Department of Chemistry and Biochemistry, University of California, Santa Cruz, California  
95064, USA*

*<sup>#</sup>These authors contributed equally to the paper*

*\*Correspondence author: Qi Pang, E-mail address: [pqigx@163.com](mailto:pqigx@163.com) ; Yibo Chen, E-mail:*

*[chenyibo@gzhu.edu.cn](mailto:chenyibo@gzhu.edu.cn) and Zesheng Li, E-mail: [lzs212@163.com](mailto:lzs212@163.com)*

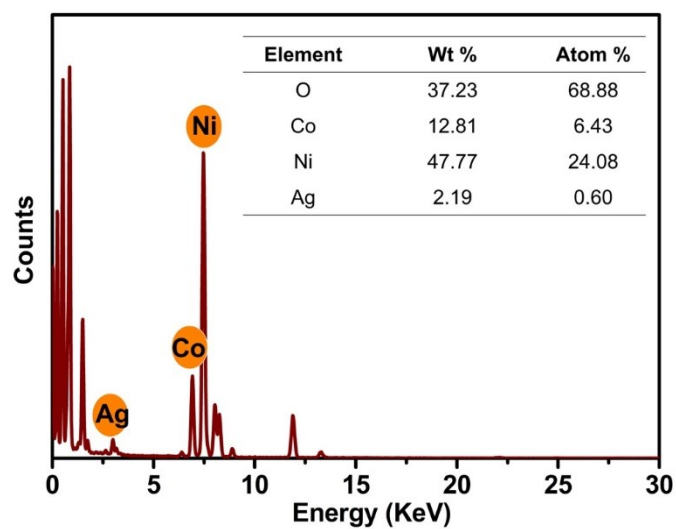

Figure S1. Elemental dispersive X-ray spectroscopy of Ag@NiCo-LDH/NF.

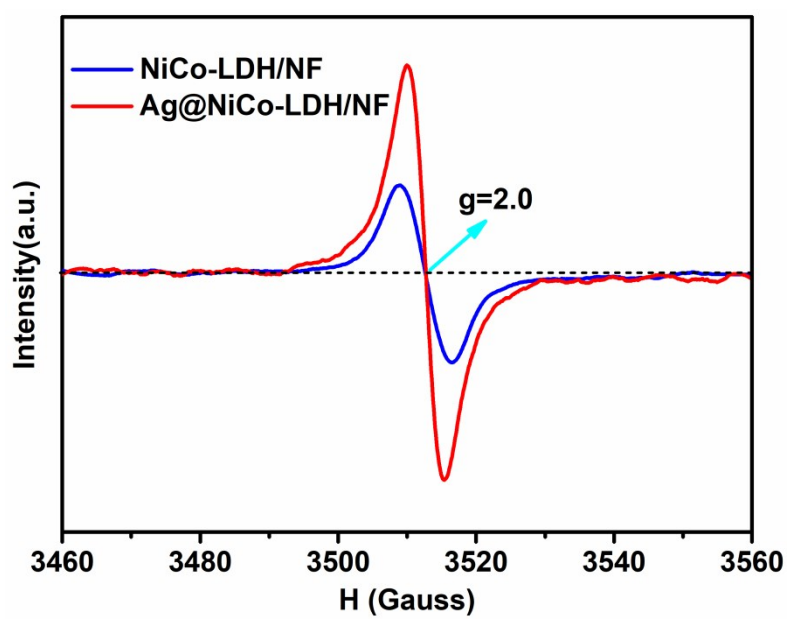

Figure S2. EPR spectra analysis of NiCo-LDH/NF and Ag@NiCo-LDH/NF.

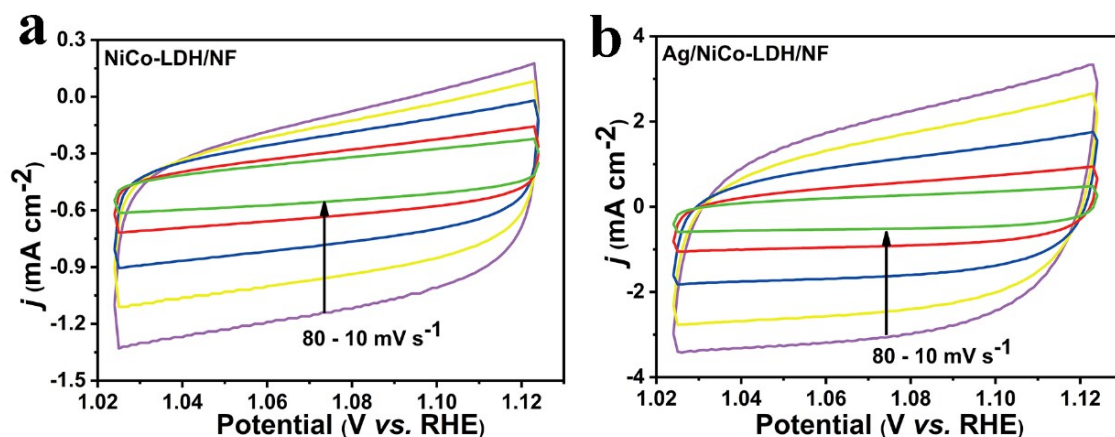

**Figure S3.** Cyclic voltammograms (CV) at various scan rates for (a) NiCo-LDH/NF; (b) Ag@NiCo-LDH/NF

**Table S1. Control samples with different Ag content**

| Samples  | The amount of Ag (mg) | else                                 |
|----------|-----------------------|--------------------------------------|
| Sample-1 | 5.6                   | The other conditions remain the same |
| Sample-2 | 14.0                  |                                      |
| Sample-3 | 28.0                  |                                      |
| Sample-4 | 42.0                  |                                      |
| Sample-5 | 50.4                  |                                      |

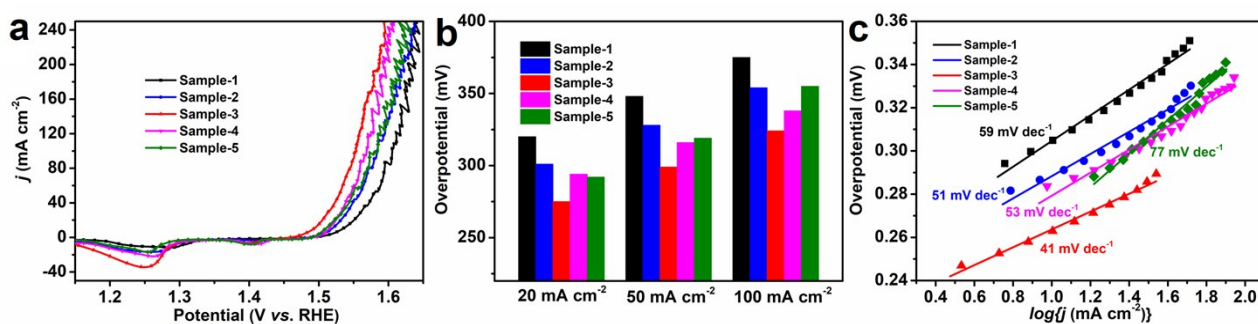

**Figure S4.** Comparison of electrocatalytic OER of control samples in Table S1: (a) Polarization curves at a scan rate of  $5 \text{ mV s}^{-1}$  and (b) Overpotential required at different current densities. (c) Tafel plot derived from (a).

**Table S2.** Electrochemical performance of NiCo-LDH/NF and Ag@NiCo-LDH/NF materials in alkaline solution.

| Samples        | $C_{dl}$ (mF $\text{cm}^{-2}$ ) | ECSA ( $\text{cm}^{-2}$ ) |
|----------------|---------------------------------|---------------------------|
| NiCo-LDH/NF    | 6                               | 150                       |
| Ag@NiCo-LDH/NF | 32                              | 800                       |

$ECSA = C_{dl}/C_s$ , Where  $C_s$  is the specific capacitance, whose value was reported to be  $0.040 \text{ mF cm}^{-2}$  in  $1.0 \text{ M KOH}$ .

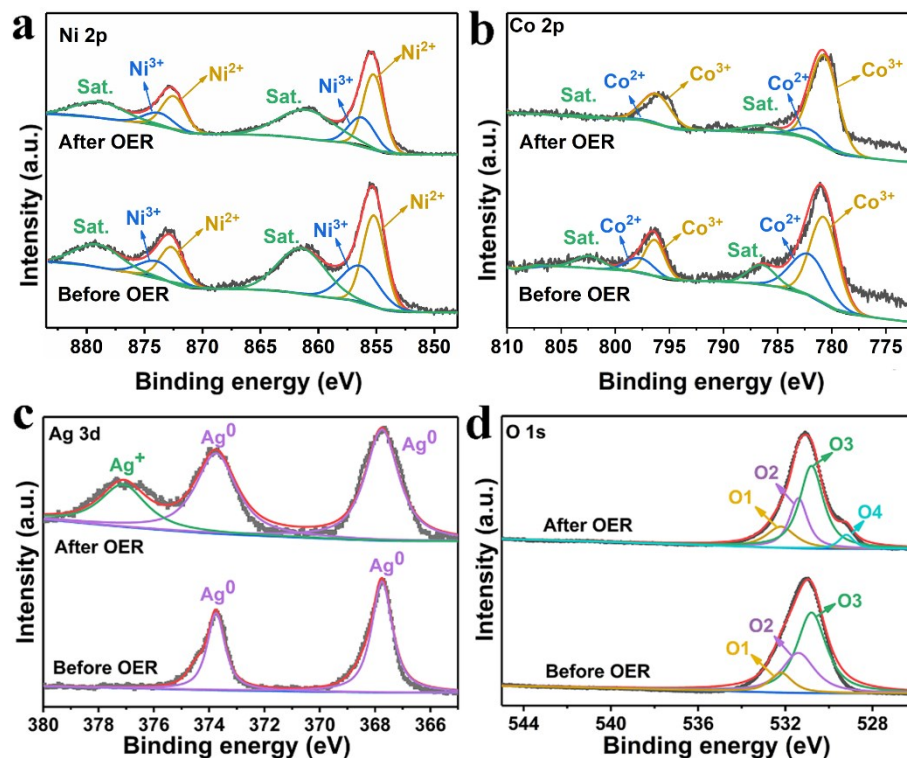

**Figure S5.** High resolution XPS spectra of (a) Ni 2p, (b) Co 2p, (c) O 1s, and (d) Ag 3d for Ag@NiCo-LDH/NF before and after OER test.

**Table S3.** Comparison OER activity in  $1 \text{ M KOH}$  for Ag@NiCo-LDH/NF with other Ni- and Co-based electrocatalysts.

| electrocatalyst                                                     | $\eta_{10@OER}$ (mV) | Tafel slope ( $\text{mV dec}^{-1}$ ) | References |
|---------------------------------------------------------------------|----------------------|--------------------------------------|------------|
| Plasma-Engraved $\text{Co}_3\text{O}_4$                             | 300                  | 68                                   | [20]       |
| $(\text{Co}_{1-x}\text{Ni}_x)(\text{S}_{1-y}\text{P}_y)_2/\text{G}$ | 285                  | 105                                  | S1         |
| Co-PBA plasma 2h                                                    | 274                  | 53                                   | S2         |
| NiCoP nanocube                                                      | 271                  | 85                                   | S3         |

|                                                            |     |      |           |
|------------------------------------------------------------|-----|------|-----------|
| Ag@NiCo-LDH /NF                                            | 262 | 41   | This work |
| Ni <sub>0.83</sub> Fe <sub>0.17</sub> (OH) <sub>2</sub>    | 245 | 61   | S4        |
| NiFeSe@NiSe O@CC                                           | 270 | 63.2 | [31]      |
| Co(OH) <sub>2</sub> NPs/Co <sub>3</sub> O <sub>4</sub> NCs | 281 | 52.7 | S5        |
| Co <sub>3</sub> O <sub>4</sub> /Co-Fe oxide DSNBS          | 297 | 61   | S6        |
| B-Ni(OH) <sub>2</sub>                                      | 340 | 43   | S7        |

## References

- [1] Song, H.J.; Yoon, H.; Ju, B.; et al., 3d Architectures of Quaternary Co-Ni-S-P/Graphene Hybrids as Highly Active and Stable Bifunctional Electrocatalysts for Overall Water Splitting, *Adv. Energy Mater.*, **2018**, 8, 1802319.
- [2] Guo, Y.; Wang, T.; Chen, J.; et al., Air Plasma Activation of Catalytic Sites in a Metal-Cyanide Framework for Efficient Oxygen Evolution Reaction, *Advanced Energy Materials*, *Adv. Energy Mater.*, **2018**, 8, 1800085.
- [3] Xuan, C.; Wang, J.; Xia, W.; et al., Porous Structured Ni-Fe-P Nanocubes Derived from a Prussian Blue Analogue as an Electrocatalyst for Efficient Overall Water Splitting, *ACS Appl. Mater. Interfaces*, **2017**, 9, 26134-26142.
- [4] Zhou, Q.; Chen, Y.; Zhao, G.; et al., Active-Site-Enriched Iron-Doped Nickel/Cobalt Hydroxide Nanosheets for Enhanced Oxygen Evolution Reaction, *ACS Catal.*, **2018**, 8, 5382-5390.
- [5] Xu, H.; Wei, J.; Zhang, M.; et al., Heterogeneous Co(OH)<sub>2</sub> Nanoplates/Co<sub>3</sub>O<sub>4</sub>

Nanocubes Enriched with Oxygen Vacancies Enable Efficient Oxygen Evolution Reaction Electrocatalysis, *Nanoscale*, **2018**, 10, 18468-18472.

[6] Wang, X.; Yu, L.; Guan, B.Y.; et al., Metal-Organic Framework Hybrid-Assisted Formation of Co<sub>3</sub>O<sub>4</sub>/Co-Fe Oxide Double-Shelled Nanoboxes for Enhanced Oxygen Evolution, *Adv. Mater.*, **2018**, 30, 1801211.

[7] Zhang, Z.; Zhang, T.; Lee, J.Y., Enhancement Effect of Borate Doping on the Oxygen Evolution Activity of A-Nickel Hydroxide, *ACS Appl. Nano Mater.*, **2018**, 1, 751-758.

## Theoretical Section

OER involves four electron transfer processes, the four basic steps are as follows:

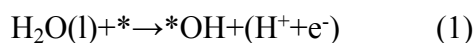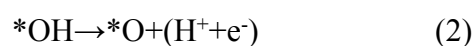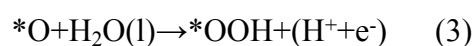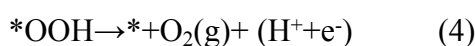

\* represented the active site on the catalyst surface; \*O,\*OH,\*OOH represented the intermediate species adsorbed on the active sites. The free energy of H<sup>+</sup>+e<sup>-</sup> was substituted by 1/2 E(H<sub>2</sub>) under conditions of pH = 0, P = 1 atm, T = 298 K conditions. The formula for calculating OER free energy is as follows: ΔG = ΔE + ΔZPE - TΔS. The ΔE can be obtained by computation of geometrical structures. ΔZPE and ΔS are calculated using gas phase of the reactants and products is determined by the vibration frequency and standard table. Assuming that the entropy of the adsorbed

atom/molecule at the surface-active site were assumed to be zero (the gas molecules as show in Table S3), and the dependence of enthalpy on temperature is neglected in the calculation.

Therefore, the free energy of each intermediate species adsorbed could be expressed as follows:

$$\Delta G(*OH)=E(*OH)-E(*)-E_{H_2O}+1/2 E_{H_2}+(\Delta ZPE-T\Delta S)_1 \quad (5)$$

$$\Delta G(*O)=E(*O)-E(*OH)+1/2 E_{H_2}+(\Delta ZPE-T\Delta S)_2 \quad (6)$$

$$\Delta G(*OOH)=E(*OOH)-E(*O)-E_{H_2O}+1/2 E_{H_2}+(\Delta ZPE-T\Delta S)_3 \quad (7)$$

where the  $E(*)$ ,  $E(*OH)$ ,  $E(*O)$ ,  $E(*OOH)$  are the total energy calculated by DFT of the pure surface and the adsorbed surfaces with  $*OH$ ,  $*O$ , and  $*OOH$ , respectively.  $E_{H_2O}$ ,  $E_{H_2}$  and  $E_{O_2}$  are the calculated energies of individual molecules of  $H_2O$ ,  $H_2$  and  $O_2$ , respectively.

The reaction energy of each step is expressed by the free energy of the intermediate, and the effects of PH and an external bias  $U$  are represented by the following equation:

$$\Delta G_1=\Delta G(*OH)-\Delta G(H_2O)-eU+k_B T \ln \alpha_{H^+} \quad (8)$$

$$\Delta G_2=\Delta G(*O)-\Delta G(*OH)-eU+k_B T \ln \alpha_{H^+} \quad (9)$$

$$\Delta G_3=\Delta G(*OOH)-\Delta G(*O)-\Delta G(H_2O)-eU+k_B T \ln \alpha_{H^+} \quad (10)$$

$$\Delta G_4=\Delta G(O_2)-\Delta G(*OOH)-eU+k_B T \ln \alpha_{H^+} \quad (11)$$

Because all energy is in water as a benchmark,  $\Delta G(H_2O)=0$  eV,  $\Delta G(O_2)=4.92$  eV(four times the equilibrium potential at the time of water formation, and 1.23 eV under

standard conditions).

The overpotential  $\eta$  is defined:

$$\eta = -\max(\Delta G1, \Delta G2, \Delta G3, \Delta G4) - 1.23 \text{ eV}$$

**Table S4** The free energy of molecules.

| □                   | Pressure /bar | Temperature /K | E(DFT) /eV | DG /eV | G /eV   | PH | -0.059*PH |
|---------------------|---------------|----------------|------------|--------|---------|----|-----------|
| O <sub>2</sub> (g)  | 1.000         | 298.150        | □          | □      | -9.920  | 14 | -0.8288   |
| H <sub>2</sub> (g)  | 1.000         | 298.150        | -6.760     | -0.045 | -6.800  |    |           |
| H <sub>2</sub> O(l) | 0.035         | 298.150        | -14.220    | -0.001 | -14.220 |    |           |

**Table S5** The free energy of NiCo-LDH.

|      | E/eV     | ZPE/eV | G/eV     |                                        | U=0,<br>PH=0 | U=0,<br>PH=0 | U=0,<br>PH=14 | U=0.401,<br>PH=14 |
|------|----------|--------|----------|----------------------------------------|--------------|--------------|---------------|-------------------|
| slab | -860.281 | 0.000  | -860.281 | +2H <sub>2</sub> O                     | -888.721     | 0.000        | 0.000         | 0.000             |
| OH*  | -871.004 | 0.377  | -870.628 | +H <sub>2</sub> O + 1/2 H <sub>2</sub> | -888.248     | 0.473        | -0.356        | -0.757            |
| O*   | -866.841 | 0.119  | -866.722 | +H <sub>2</sub> O + H <sub>2</sub>     | -887.742     | 0.978        | -0.679        | -1.482            |
| OOH* | -875.100 | 0.450  | -874.651 | + 3/2 H <sub>2</sub>                   | -884.851     | 3.870        | 1.384         | 0.180             |
| slab | -860.281 | 0.000  | -860.281 | + O <sub>2</sub> + 2H <sub>2</sub>     | -883.801     | 4.920        | 1.605         | 0.000             |

**Table S6.** The free energy of Ag@NiCo-LDH.

|      | E/eV     | ZPE/eV | G/eV     |                                           | U=0,<br>PH=0 | U=0,<br>PH=0 | U=0,<br>PH=14 | U=0.401,<br>PH=14 |
|------|----------|--------|----------|-------------------------------------------|--------------|--------------|---------------|-------------------|
| slab | -857.732 | 0.000  | -857.732 | +2H <sub>2</sub> O                        | -886.172     | 0.000        | 0.000         | 0.000             |
| OH*  | -868.866 | 0.336  | -868.529 | +H <sub>2</sub> O + 1/2<br>H <sub>2</sub> | -886.149     | 0.023        | -0.806        | -1.207            |
| O*   | -864.463 | 0.096  | -864.368 | +H <sub>2</sub> O + H <sub>2</sub>        | -885.388     | 0.785        | -0.873        | -1.675            |
| OOH* | -873.076 | 0.435  | -872.642 | + 3/2 H <sub>2</sub>                      | -882.842     | 3.331        | 0.845         | -0.359            |



|      |          |       |          |                                    |          |       |       |       |
|------|----------|-------|----------|------------------------------------|----------|-------|-------|-------|
| slab | -857.732 | 0.000 | -857.732 | + O <sub>2</sub> + 2H <sub>2</sub> | -881.252 | 4.920 | 1.605 | 0.000 |
|------|----------|-------|----------|------------------------------------|----------|-------|-------|-------|

**Table S7.** The Crystal Orbital Hamilton Populations for Ag@NiCo-LDH (**Figure 8. a)**)

| -ICOHP | 5s-2s up | 5s-2s dw | 5s-2p up | 5s-2p dw | 4d-2s up | 4d-2s dw | 4d-2p up | 4d-2p dw | total |
|--------|----------|----------|----------|----------|----------|----------|----------|----------|-------|
| Ag1-O1 | 0.111    | 0.128    | 0.223    | 0.213    | 0.005    | 0.003    | 0.010    | 0.025    | 0.718 |
| Ag1-O2 | 0.143    | 0.165    | 0.256    | 0.250    | 0.012    | 0.011    | 0.025    | 0.040    | 0.902 |
| Ag1-O3 | 0.144    | 0.167    | 0.261    | 0.254    | 0.012    | 0.010    | 0.028    | 0.043    | 0.918 |
| Ag2-O4 | 0.149    | 0.158    | 0.262    | 0.265    | 0.009    | 0.010    | 0.013    | 0.044    | 0.909 |
| Ag2-O5 | 0.178    | 0.189    | 0.302    | 0.305    | 0.026    | 0.029    | 0.041    | 0.067    | 1.135 |
| Ag2-O6 | 0.183    | 0.194    | 0.300    | 0.302    | 0.024    | 0.026    | 0.041    | 0.066    | 1.136 |

**Table S8.** The Crystal Orbital Hamilton Populations for NiCo-LDH (**Figure S1)**)

| -ICOHP | 5s-2s up | 5s-2s dw | 5s-2p up | 5s-2p dw | 4d-2s up | 4d-2s dw | 4d-2p up | 4d-2p dw | total |
|--------|----------|----------|----------|----------|----------|----------|----------|----------|-------|
| Ni-O7  | 0.205    | 0.212    | 0.213    | 0.214    | -0.007   | 0.063    | 0.014    | 0.262    | 1.176 |
| Ni-O8  | 0.212    | 0.215    | 0.218    | 0.220    | -0.006   | 0.064    | 0.015    | 0.274    | 1.211 |
| Ni-O9  | 0.218    | 0.220    | 0.218    | 0.220    | -0.006   | 0.064    | 0.016    | 0.274    | 1.224 |
| Ni-O10 | 0.226    | 0.231    | 0.272    | 0.270    | -0.010   | 0.065    | 0.020    | 0.276    | 1.351 |
| Ni-O11 | 0.224    | 0.228    | 0.262    | 0.260    | -0.009   | 0.065    | 0.019    | 0.279    | 1.328 |
| Ni-O12 | 0.219    | 0.228    | 0.255    | 0.256    | -0.010   | 0.065    | 0.017    | 0.265    | 1.295 |

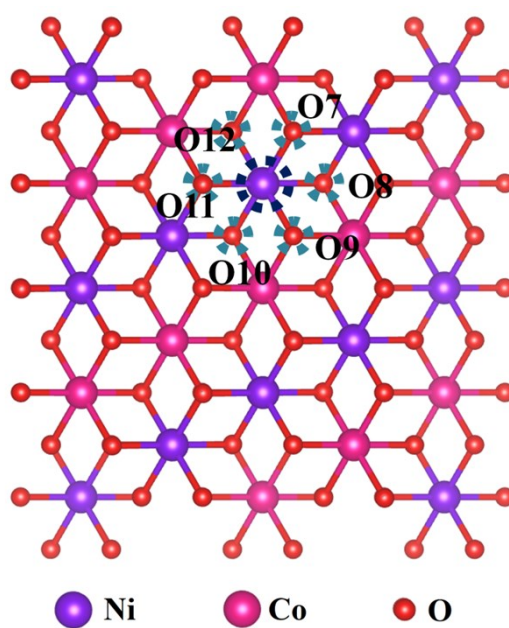

**Figure S6.** Top view of the crystal model of NiCo-LDH.

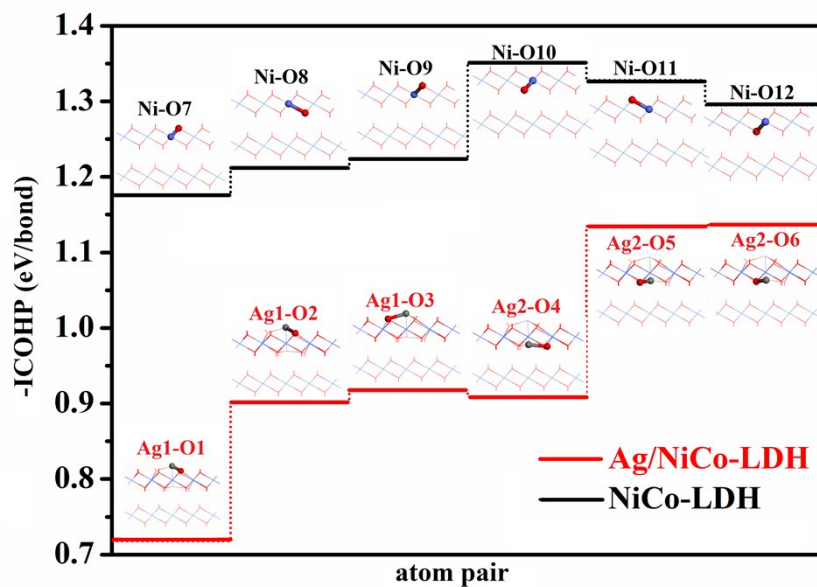

**Figure S7.** The -ICOHP of NiCo-LDH and Ag@NiCo-LDH.

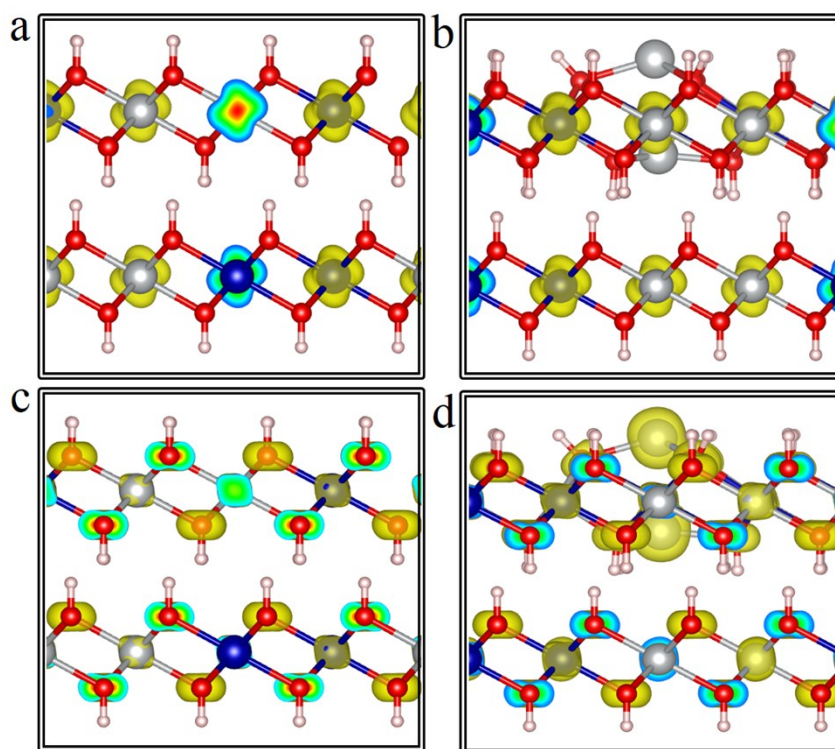

**Figure S8.** The partial charge density (-0.7~0 eV, isovalue = 0.03 atomic units) of (a) NiCo-LDH and (b) Ag@NiCo-LDH, the partial charge density (-2~-6 eV, isovalue = 0.1 atomic units) of (c) NiCo-LDH and (d) Ag@NiCo-LDH.
